# 1 **Human mediated dispersal of cats in the Neolithic Central Europe**

2 Mateusz Baca<sup>1\*,a</sup>, Danijela Popović<sup>1,a</sup>, Hanna Panagiotopoulou<sup>2</sup>, Adrian Marciszak<sup>3</sup>, Magdalena  
3 Krajcarz<sup>4</sup>, Maciej T. Krajcarz<sup>5</sup>, Daniel Makowiecki<sup>4</sup>, Piotr Węgleński<sup>1</sup>, Adam Nadachowski<sup>6</sup>

4

5 <sup>1</sup> Laboratory of Paleogenetics and Conservation Genetics, Centre of New Technologies, University  
6 of Warsaw, Banacha 2c, 02-079 Warsaw, Poland.

7 <sup>2</sup> Museum and Institute of Zoology, Polish Academy of Sciences, Wilcza 64, 00-679 Warsaw,  
8 Poland.

9 <sup>3</sup> Department of Paleozoology, Institute of Environmental Biology, University of Wrocław,  
10 Sienkiewicza 21, 50-335 Wrocław, Poland.

11 <sup>4</sup> Institute of Archaeology, Faculty of History, Nicolaus Copernicus University, Szosa Bydgoska  
12 44/48, 87-100 Torun, Poland.

13 <sup>5</sup> Institute of Geological Sciences, Polish Academy of Sciences, Research Centre in Warsaw,  
14 Twarda 51/55, 00-818 Warsaw, Poland.

15 <sup>6</sup> Institute of Systematics and Evolution of Animals, Polish Academy of Sciences, Sławkowska 17,  
16 31-016 Krakow, Poland.

17

18 \*Correspondence to Mateusz Baca: Laboratory of Paleogenetics and Conservation Genetics, Centre  
19 of New Technologies, University of Warsaw, Banacha 2c, 02-079 Warsaw, Poland.

20 [bacamat@gmail.com](mailto:bacamat@gmail.com); Phone: 0048 22 5543749; Fax: 0048 22 5540801

21 <sup>a</sup> Those authors equally contributed to this work

22 **Running title: Cats in the Neolithic Central Europe**

23 Word count: 2876

24 **Keywords:** Near Eastern wildcats, ancient DNA, domestication, commensalism, Neolithic, human  
25 mediated dispersal

26

## 27 **Abstract:**

28 Archaeological and genetic evidence suggest that all domestic cats derive from the Near Eastern  
29 wildcat (*Felis silvestris lybica*) and were domesticated twice, first in the Near East around 10 000  
30 years ago and for the second time in Ancient Egypt ca. 3 500 years ago. The spread of the  
31 domesticated form in Europe occurred much later, primarily mediated by Greek and Phoenician  
32 traders and afterwards by Romans who introduced cats to Western and Central Europe around 2 000  
33 years ago. We investigated mtDNA of Holocene *Felis* remains and provide evidence of an  
34 unexpectedly early presence of cats bearing the Near Eastern wildcat mtDNA haplotypes in Central  
35 Europe, being ahead of Roman Period by over 2 000 years. The appearance of the Near Eastern  
36 wildcats in Central Europe coincide with the peak of Neolithic settlement density, moreover most of  
37 those cats belonged to the same mtDNA lineages as those domesticated in the Near East. Thus,  
38 although we cannot fully exclude that the Near Eastern wildcats appeared in Central Europe as a  
39 result of introgression with European wildcat, our findings strongly support the hypothesis that the  
40 Near Eastern wildcats spread across Europe together with the first farmers, perhaps as commensal  
41 animals. We also found that cats dated to the Neolithic period belonged to different mtDNA  
42 lineages than those brought to Central Europe in Roman times, this supports the hypothesis that the  
43 gene pool of contemporary European domestic cats might have been established from two different  
44 source populations that contributed in different periods.

45

## 46 **Introduction**

47 Latest research on the wildcat *Felis silvestris* phylogeny resulted in distinction of five subspecies  
48 rank groups, corresponding to their geographical distribution (Driscoll *et al.*, 2007, 2009): European  
49 wildcat, Southern African wildcat, Central Asian wildcat, Near Eastern wildcat and Chinese desert  
50 cat. Today, the European range of *F. silvestris* includes two subspecies. The European wildcat (*F. s.*  
51 *silvestris*) represents the only native form in most of the region. This animal was formerly widely  
52 distributed in Europe, except Fennoscandia (Yamaguchi *et al.*, 2015), however has become extinct  
53 in many areas mainly due to hunting and habitat losses. The second subspecies, domestic cat (*F. s.*

54 *catus*), is of anthropogenic origin. The history of cat domestication was reconstructed with use of  
55 preserved written sources, art objects and archaeozoological material and significantly supported  
56 during last years with genetic studies. According to genetic data, domestic cats do not descend from  
57 European wildcat, although European wildcat and domestic cat may share territory and crossbreed  
58 as interfertile taxa. The common ancestor to all modern domestic cats was the Near Eastern wildcat,  
59 *F. s. lybica* (Driscoll *et al.*, 2007), domesticated in the Near East during Neolithic (Vigne *et al.*,  
60 2004; Driscoll *et al.*, 2009; Faure and Kitchener, 2009; Ottoni *et al.*, 2017). The descendants of the  
61 domesticated Near Eastern wildcats were later spread across the world along with civilization  
62 expansion. Recently, analysis of mtDNA from more than 200 *Felis* remains revealed that cats were  
63 domesticated from at least two different local populations of the Near Eastern wildcats, for the first  
64 time in the Near East and for the second in Ancient Egypt (Ottoni *et al.*, 2017).

65 According to the current knowledge, the domestic cat did not occur in Central Europe prior to  
66 Roman Period (Benecke, 1994; Clutton-Brock, 1999; Driscoll *et al.*, 2009; Faure and Kitchener,  
67 2009; Krajcarz *et al.*, 2016), however the chronology of the Near Eastern wildcat introduction to  
68 different regions of Europe is still weakly understood. The archaeozoological and paleontological  
69 records are poor and direct chronometric data and ancient DNA analyses of fossil cats are still rare.

70 The preliminary study about the history of domestic cats in Poland (Krajcarz *et al.*, 2016) revealed  
71 no presence of domesticated forms in archaeological contexts before 1<sup>st</sup> century AD. Since that  
72 study was focused on archaeozoological material and did not include cat remains from non-human  
73 related sites, there was a risk of overlooking the natural or civilization related expansions of cats  
74 from the Near East. Here, we extended the prior survey to fossil Holocene cat's remains recovered  
75 from outside the archaeological contexts.

## 76 **Materials and Methods**

77 We analysed bone fragments of 36 individuals from 19 sites in Poland (**Supplementary Table S1**)  
78 that were provisionally classified as *Felis* sp. or *Felis silvestris*. This include six specimens  
79 excavated from archaeological contexts for which partial mtDNA ND5 sequence was already  
80 published (Krajcarz *et al.*, 2016). Sample handling and DNA extraction were performed in a

81 laboratory dedicated to ancient DNA analyses in the Laboratory of Paleogenetics and Conservation  
82 Genetics, Centre of New Technologies at the University of Warsaw. Strict contamination  
83 precautions were undertaken during all steps of the experimental procedure. Prior to DNA  
84 extraction, each sample was washed with bleach solution (6% w/v sodium hypochlorite), rinsed  
85 with double distilled water, UV-irradiated (245 nm) for 20 minutes on each side and pulverized in  
86 cryogenic mill (SPEX CentriPrep, Stanmore, UK). DNA extraction was performed using modified  
87 silica column based method optimized to retrieve short DNA fragments (Dabney *et al.*, 2013).  
88 Samples were processed in batches of 16 with a negative control included in each batch. First we  
89 screened all samples for DNA preservation by amplification of a short fragment of mitochondrial  
90 ND5 gene. Thirty-three samples yielded DNA sequence that allow initial species assignment  
91 (**Supplementary Table 1**). To obtain longer fragment of the mtDNA sequences we used a targeted  
92 enrichment approach. For the hybridization experiment we choose 20 samples, 12 that yielded *F. s.*  
93 *lybica/catus*, and eight that yielded *F.s. silvestris* haplotypes during initial screening. Those samples  
94 were either already radiocarbon dated or there was enough bone left to perform dating. DNA  
95 extracts were converted into double-indexed sequencing libraries following modified protocol of  
96 Kircher and Meyer (2010). To minimize sample cross-talk during sequencing, beside double-  
97 indexing, we used adapters containing 7 bp long barcodes (Rohland *et al.*, 2014). We targeted a 6  
98 kb fragment of mtDNA genome spanning position from 11 487 to 925. Hybridization bait was  
99 produced from the DNA of a contemporary domestic cat. DNA from swab was extracted with  
100 DNeasy Blood & Tissue Kit (Qiagen), and then the desired mtDNA fragment was amplified with  
101 three primer pairs. PCR products were sonicated to the length of around 200 bp with Covaris S220  
102 and converted into bait following the protocol of Marčić *et al.* (2010). Hybridization was carried on  
103 pools of up to five libraries. We performed two rounds of hybridisation for 21h each following the  
104 protocol proposed by Horn (2012). Libraries were amplified for 19 cycles after the first and for 17  
105 cycles after the second round. Enriched libraries were quantified with qPCR (Illumina Library  
106 Quantification kit, KAPA), pooled in equimolar ratios and sequenced with other libraries on  
107 NextSeq or on MiSeq platform (Illumina) in the 2 x 75 bp or 2 x 150 modes, respectively. Libraries

108 produced from extraction negative controls were pooled, hybridized and sequenced as other  
109 libraries.

110 Sequencing reads were demultiplexed using Bcl2fastq, reads containing appropriate barcode were  
111 filtered with Sabre script, and then AdapterRemoval v. 2 (Lindgreen, 2012) was used to collapse  
112 overlapping reads. Reads were mapped to cat reference mtDNA sequence using Bwa (Li and  
113 Durbin, 2010), only reads with mapping quality over 30 and longer than 30 bp were retained.  
114 Duplicates were removed; variants and consensus sequences were called using Samtools and  
115 Bcftools (Li *et al.*, 2009). We called only positions with minimum 2 x coverage. Each bam  
116 alignment was inspected manually in Tablet (Milne *et al.*, 2013). Endogenous ancient DNA  
117 molecules typically exhibit excess of deaminated cytosine towards the ends of molecules; we used  
118 MapDamage v.2 (Jónsson *et al.*, 2013) to check whether this pattern was present in the analysed  
119 samples.

## 120 **Phylogenetic analyses**

121 To reconstruct the phylogenetic position of the analysed cat remains we used large dataset of  
122 sequences of contemporary wildcats and domestic cats published by Driscoll *et al.* (2007). The final  
123 dataset consisted of 160 distinct haplotypes encompassing the 2 604 bp long fragment between  
124 positions 12 642 and 15 245 of cat's mtDNA. Phylogenies were reconstructed with Bayesian and  
125 Maximum Likelihood methods using MrBayes 3.2.6 (Ronquist *et al.*, 2012) and PhyML 3.1  
126 (Guindon *et al.*, 2010). Best partitioning scheme and substitution model for Bayesian analysis was  
127 found with PartitionFinder 2.1.1 (Lanfear *et al.*, 2016) (**Supplementary Table 2 & 3**). The analysis  
128 consisted of two independent runs with four chains each, and was run for 10 000 000 generations  
129 with parameters sampled every 1 000 generation. Stationarity and convergence were assessed in  
130 Tracer v. 1.6 (ESS>200) (Rambaut and Drummond, 2007). We also confirmed the average standard  
131 deviation of split frequencies to be below 0.01. In Maximum Likelihood analysis the HKY + G  
132 substitution model was used as indicated by jModeltest 2 (Darriba *et al.*, 2012). The best tree was  
133 chosen out of those obtained with NNI and SPR tree rearrangement algorithms, approximate  
134 likelihood-ratio test with Shimodaira-Hasegawa ([SH]-aLRT) procedure was applied to assess  
135 branch support.

## 136 **Radiocarbon dating**

137 Radiocarbon dating of selected samples was performed in Poznan Radiocarbon Laboratory using  
138 accelerator mass spectrometry method. Obtained  $^{14}\text{C}$  dates were calibrated in OxCal v. 4.2.4 (Bronk  
139 Ramsey, 2009) using IntCal13 calibration curve (Reimer *et al.*, 2013).

## 140 **Results**

141 Out of 20 samples used in hybridization capture experiment 18 produced targeted mtDNA fragment  
142 with minimum of 70% sites covered at least two times and those samples were used in phylogenetic  
143 reconstruction (**Supplementary Table 4**). In case of sample Lo1 the recovered fragment of mtDNA  
144 was too short to be used in phylogenetic reconstruction but confirmed subspecies assignment. DNA  
145 molecules of majority of the samples exhibit damage pattern typical for ancient DNA, only in case  
146 of two youngest samples Bis and Ap1 the pattern was questionable (**Supplementary Fig. 1**). This is  
147 however expected, as the amount of damage is the function of time after deposition. Careful  
148 examination of bam alignments revealed no signs of contamination. There was also no reads  
149 mapping to cat's mtDNA genome in extraction negative controls.

150 Reconstructed phylogeny correspond to this obtained earlier by (Driscoll *et al.*, 2007) with clearly  
151 separated lineages of European wildcats and Near Eastern wildcats/domestic cats with five  
152 sublineages (A – E) distinguished within the latter (**Fig. 1**). Within sublineage A a branch recently  
153 marked A1 by (Ottoni *et al.*, 2017) was observed with moderate support values. Phylogenetic  
154 analyses confirmed the initial subspecies assignment and 11 samples were classified as *F. s.*  
155 *lybica/catus* and seven as *F. s. silvestris* (**Fig. 1**). Out of 11 specimens with *F. s. lybica/catus*  
156 mtDNA haplotypes, two specimens yielded modern, two Late Medieval, one Early Medieval and  
157 one Roman ages according to radiocarbon dating, while the five other yielded surprisingly early  
158 ages of Middle to Late Neolithic, ranging between 5 300 and 4 200 years cal BP (**Fig. 2;**  
159 **Supplementary Table 5**). The reliability of dating was confirmed by measurements of the C/N  
160 ratio in collagen, which was in accepted range (2.9 – 3.6) (DeNiro, 1985). Only in case of one  
161 Neolithic sample the collagen yield was too low to confirm quality of the dated material  
162 (**Supplementary Table 5**). Those five samples come from three paleontological sites, Shelter in

163 Krucza Skala (Ks1), Perspektywiczna Cave (Pe1, Pe4, Pe5) and Shelter in Smoleń III (Sh4) and  
164 were not associated with cultural remains. Sample Ks1 belonged to sublineage A, Sh4 to A1 while  
165 samples Pe1, Pe4 and Pe5 to sublineage B. Samples Pe1, Pe4 and Pe5 yielded similar radiocarbon  
166 dates and mtDNA haplotypes, although bones comes from different, non-contiguous layers and  
167 distant parts of the site, we cannot exclude possibility that they belong to the single individual. *F. s.*  
168 *lybica/catus* specimens dated to the Roman period until modern times comes both from  
169 anthropogenic (Ka1, S11, Bis, Bo2) and paleontological (Ap1, Pe8) contexts (**Supplementary**  
170 **Table 1**). Most of them belonged to mtDNA sublineage C (Ka1, S11, Bis, Ap1), while Bo2  
171 belonged to sublineage D and Pe8 to A.



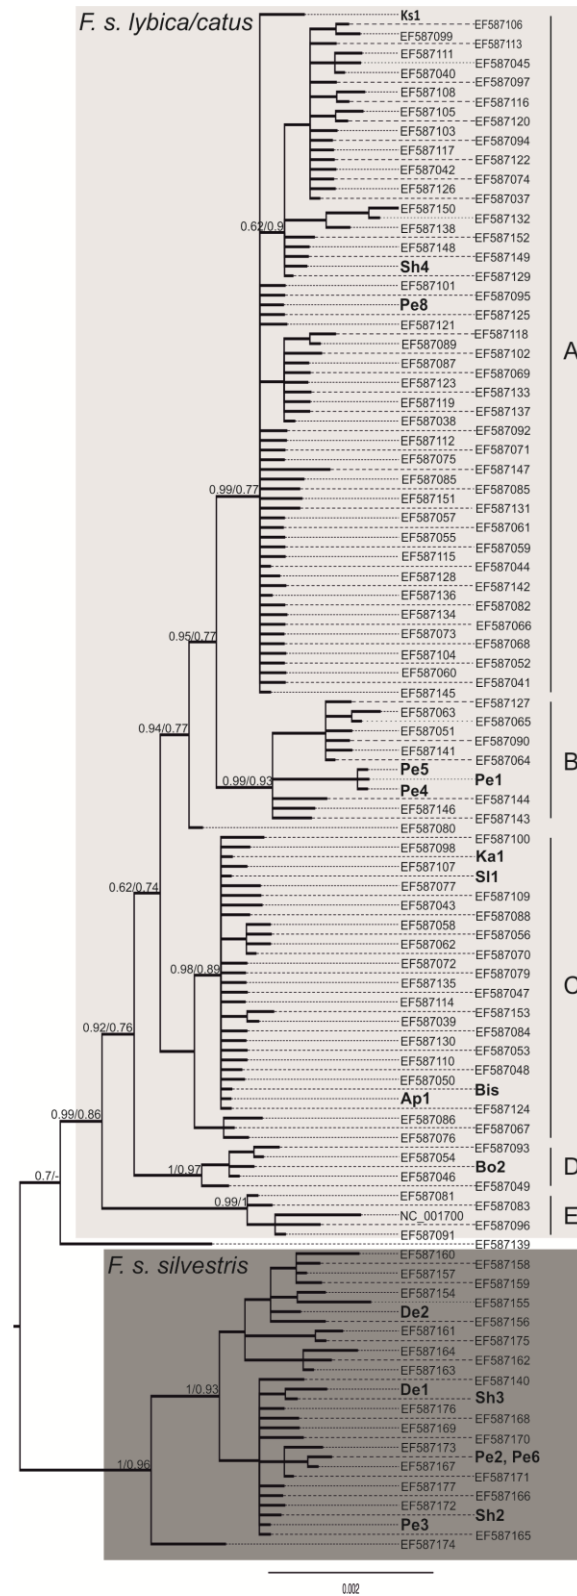

172

173

**Figure 1. Phylogeny of Holocene and contemporary cats.**

174

Bayesian phylogeny based on 160 mtDNA haplotypes of Holocene and contemporary cats. Haplotypes of studied

175

samples are bolded. Numbers at nodes indicate posterior probability and SH support values obtained with Bayesian and

176

Maximum Likelihood approaches, respectively. The tree was rooted with sequence of *Felis margarita* (not shown).





190 considered as well. Firstly, their presence could have resulted from natural expansion of *F. s. lybica*  
191 from the Near East during the period of favourable climatic conditions. Secondly, it could have  
192 resulted from ancient hybridization between European and the Near Eastern wildcats, and  
193 subsequent spread of the introgressed individuals into Central Europe. Lastly, the Near Eastern  
194 wildcat specimens might have followed humans as synanthropic commensals during the expansion  
195 of Neolithic cultures.

196 The first scenario seems the least likely one. Near Eastern wildcats inhabit mostly hot and dry  
197 climatic zones of Northern Africa and Arabian Peninsula with steppe environments including  
198 savannas and shrub grasslands (Yamaguchi *et al.*, 2015). Paleoclimate data suggest that the period  
199 when the Near Eastern wildcat's haplotype appeared in Poland was characterized by relatively cool  
200 and moist climate with high rate of precipitation and elevated water level (Starkel *et al.*, 2006,  
201 2013) (**Fig. 2**). This, together with co-occurrence of native European wildcat that mostly inhabits  
202 forests, makes the natural expansion of *F. s. lybica* into territory of modern Poland implausible. The  
203 second scenario that assumes ancient hybridization of European and the Near Eastern wildcats is  
204 more credible. Nowadays hybridization between European wildcats and feral domestic cats is  
205 common (Randi *et al.*, 2001; Oliveira *et al.*, 2008; Hertwig *et al.*, 2009; Mattucci *et al.*, 2013).  
206 Moreover, Driscoll *et al.*, (2007) found 28 individuals with domestic cat mtDNA among 108  
207 individuals with purely European wildcat nuclear DNA. Such mito-nuclear discordance was  
208 interpreted as a result of hybridization event between wildcat subspecies that might have taken  
209 place shortly after the domestic cats were brought into the range of European wildcats. Recently, *F.*  
210 *s. lybica* haplotypes were found also in pre-Neolithic Romania those individuals belonged  
211 exclusively to mitochondrial lineage A1 (Ottoni *et al.*, 2017). This finding led authors to conclusion  
212 that since the beginning of Holocene the natural range of Near Eastern wildcats was wider and  
213 included also Southeastern Europe, which became also a historical hybrid zone for European and  
214 Near Eastern wildcats. In consequence, the mitochondrial haplotypes of the *F. s. lybica/catus* might  
215 have spread in the *F. s. silvestris* populations in Europe. Similar mito-nuclear discordances were  
216 observed in other mammalian taxa and interpreted as a result of hybridization after temporary  
217 contact between their populations in the past (Alves *et al.*, 2008; Toews and Brelsford, 2012).

218 Interestingly, the dating of the oldest remains with *F. s. lybica/catus* haplotypes coincides with the  
219 appearance of the early farmers in Poland. The earliest Neolithic settlements of Linear Band Pottery  
220 culture in Poland appeared around 7 500 years cal BP (Czekaj-Zastawny, 2017). The peak of  
221 Neolithic settlement density falls between 5 500 and 4 500 years cal BP in Kuyavia and between  
222 5 000 and 4 000 in Lesser Poland (Timpson *et al.*, 2014). This leads to the third scenario that  
223 hypothesizes a spread of the Near Eastern wildcat throughout Europe as a commensal form that  
224 followed human groups during the dispersal of Neolithic cultures. The similar way of spread  
225 alongside early farmers was recently well documented for early-domesticated pigs (Larson *et al.*,  
226 2007; Ottoni *et al.*, 2013). Processes of wildcat and wild boar domestication have followed the  
227 similar, i.e. commensal, pathway (Larson and Fuller, 2014). In its early stages, during Early  
228 Holocene, cats and boars had been attracted to human settlements by food wastes and pests and  
229 without any deliberate humans activities (Driscoll *et al.*, 2009). Pigs were, however, recognized as a  
230 valuable resource and domesticated much earlier than cats, which remained mostly commensal  
231 species for next several thousands of years (Larson and Fuller, 2014). The expansion of wildcats to  
232 Europe as commensal animals together with early Neolithic groups might have resulted in the  
233 observed pattern with Near Eastern wildcat remains found in paleontological contexts not related  
234 with humans. Phylogenetic position of *F. s. lybica/catus* individuals from Neolithic Poland strongly  
235 supports this scenario, although the presence of lineage A1 may have resulted from introgression of  
236 European wildcats with natural population of Near Eastern wildcats in Southeast Europe. However,  
237 the presence of lineages A and B cannot be easily explained this way. Lineage A was the main  
238 lineage which was domesticated in the Near East and which is the most frequent lineage in recent  
239 domestic cats. Individual belonging to this lineage was reported in Early Neolithic Bulgaria around  
240 6 400 years BP, what was also interpreted as a result of human mediated dispersal (Ottoni *et al.*,  
241 2017). Lineage B, the second domesticated lineage was found so far only in Southeast Anatolia,  
242 Jordan and Iran. Given that in the dataset by Ottoni *et al.* (2017) there is no a single instance of  
243 European wildcat in Anatolia, it's unlikely that presence of those lineages in Central Europe may  
244 have resulted from introgression between *Felis* subspecies. This suggests rather a scenario where  
245 the Near Eastern wildcats spread together with early farmers from Anatolia first to Southeast

246 Europe where they crossbreed with local population and acquired lineage A1 and then further  
247 northwest to Central Europe. There is also, however, a range of possible intermediate scenarios that  
248 cannot be ruled out, such as hybridization between European and Near Eastern wildcats after arrival  
249 of early farmers (i.e. haplogroups A and possibly B) to Southeast Europe.

250         Interesting is the apparent discontinuity between Neolithic and younger samples. Although  
251 based on a limited sample size, it suggests that the cats from Neolithic period steam from different  
252 source population than domestic cats brought to Central Europe by Romans and that the gene pool  
253 of contemporary European domestic cats might have been established from the two different source  
254 populations that contributed in the two different periods. This is in line with the findings by Ottoni  
255 *et al.* (2017) who showed that cats introduced to Europe during Classical times belonged mostly to  
256 lineage C domesticated in Egypt.

257         Investigation of mtDNA from Holocene *Felis* remains revealed *F. s. lybica/catus* haplotypes  
258 present in Central Europe already in Neolithic period. The available data does not allow for certain  
259 discrimination between alternatives explaining their presence, however strongly supports dispersal  
260 mediated by humans. This transforms current knowledge and poses new questions about the history  
261 of domestic cats in Europe. As there is no evidence for domestic cats in archaeological record prior  
262 to Roman Period, how and to what extent cats that spread in Europe during Neolithic participated in  
263 the genepool of contemporary cats? Further investigation of Holocene and recent cats with a panel  
264 of nuclear markers would enable tracing the ancestry of contemporary domestic cats.

265

## 266 **Acknowledgements:**

267 We acknowledge Anna Baca for her help in editing and proofreading of the manuscript. Cat  
268 remains from Perspektywiczna Cave and Shelter in Smoleń III were collected during field works  
269 supported by the National Science Centre, Poland, grant numbers 2011/01/N/HS3/01299 and  
270 2014/15/D/HS3/01302, and radiocarbon dating was supported by the National Science Centre,  
271 Poland, grant number 2014/13/D/HS3/03842. MB was supported by the National Science Centre,

272 Poland, grant number 2015/19/D/NZ8/03878.

273 **Conflict of interest:**

274 Authors declare no conflict of interest

275 **Data archiving:**

276 Nucleotide sequences reported in this study were deposited in GenBank under accession no.  
277 MG813950 - MG813967.

278 **Author contributions:**

279 MB and MK conceived and coordinated the study; MK, MTK, AM, AN, DM provided samples and  
280 radiocarbon dating; DP, HP, and MB participated in laboratory work; MB and DP carried out the  
281 phylogenetic analyses; MB, MK and MTK wrote the manuscript with significant input from all the  
282 authors. All authors gave final approval for publication.

283

284 **References**

285 Alves PC, Melo-Ferreira J, Freitas H, Boursot P (2008). The ubiquitous mountain hare  
286 mitochondria: multiple introgressive hybridization in hares, genus *Lepus*. *Philos Trans R Soc*  
287 *Lond B Biol Sci* **363**: 2831–2839.

288 Benecke N (1994). *Der Mensch und seine Haustiere. Die Geschichte einer jahrtausendealten*  
289 *Beziehung*. Konrad Theiss-Verlag: Stuttgart.

290 Bronk Ramsey C (2009). Bayesian Analysis of Radiocarbon Dates. *Radiocarbon* **51**: 337–360.

291 Clutton-Brock J (1999). *A Natural History of Domesticated Mammal*. Natural History Museum:  
292 London.

293 Czekaj-Zastawny A (2017). The first farmers from the south - Linear Pottery culture. In: Urbańczyk  
294 P (ed) *The Past Societies. Polish lands from the first evidence of human presence to the Early*  
295 *Middle Ages 2: 5500-2000 BC*, Institute of Archaeology and Ehtnology. Polish Academy of

- 296 Science: Warsaw, p .
- 297 Dabney J, Knapp M, Glocke I, Gansauge M-T, Weihmann A, Nickel B, *et al.* (2013). Complete  
298 mitochondrial genome sequence of a Middle Pleistocene cave bear reconstructed from  
299 ultrashort DNA fragments. *Proc Natl Acad Sci U S A* **110**: 15758–63.
- 300 Darriba D, Taboada GL, Doallo R, Posada D (2012). jModelTest 2: more models, new heuristics  
301 and parallel computing. *Nat Methods* **9**: 772–772.
- 302 DeNiro M (1985). Postmortem preservation and alteration of in vivo bone collagen isotope ratios in  
303 relation to palaeodietary reconstruction. *Nature* **317**: 806–809.
- 304 Driscoll CA, Macdonald DW, O’Brien SJ (2009). From wild animals to domestic pets, an  
305 evolutionary view of domestication. *Proc Natl Acad Sci U S A* **106 Suppl**: 9971–8.
- 306 Driscoll CA, Menotti-Raymond M, Roca AL, Hupe K, Johnson WE, Geffen E, *et al.* (2007). The  
307 Near Eastern origin of cat domestication. *Science* **317**: 519–23.
- 308 Faure E, Kitchener AC (2009). An archaeological and historical review of the relationships between  
309 felids and people. *Anthrozoos* **22**: 221–238.
- 310 Guindon S, Dufayard J-F, Lefort V, Anisimova M, Hordijk W, Gascuel O (2010). New algorithms  
311 and methods to estimate maximum-likelihood phylogenies: assessing the performance of  
312 PhyML 3.0. *Syst Biol* **59**: 307–21.
- 313 Hertwig ST, Schweizer M, Stepanow S, Jungnickel A, Bohle UR, Fischer MS (2009). Regionally  
314 high rates of hybridization and introgression in German wildcat populations (*Felis silvestris*,  
315 Carnivora, Felidae). *J Zool Syst Evol Res* **47**: 283–297.
- 316 Horn S (2012). Target Enrichment via DNA Hybridization Capture. In: Shapiro B, Hofreiter M  
317 (eds) *Ancient DNA. Methods and Protocols.*, Methods in Molecular Biology (Clifton, N.J.).  
318 Humana Press: Totowa, NJ Vol 840, pp 189–95.
- 319 Jónsson H, Ginolhac A, Schubert M, Johnson PLF, Orlando L (2013). MapDamage2.0: Fast  
320 approximate Bayesian estimates of ancient DNA damage parameters. *Bioinformatics* **29**:

- 321 1682–1684.
- 322 Krajcarz M, Makowiecki D, Krajcarz MT, Masłowska A, Baca M, Panagiotopoulou H, *et al.*  
323 (2016). On the Trail of the Oldest Domestic Cat in Poland. An Insight from Morphometry,  
324 Ancient DNA and Radiocarbon Dating. *Int J Osteoarchaeol* **26**: 912–919.
- 325 Lanfear R, Frandsen PB, Wright AM, Senfeld T, Calcott B (2016). PartitionFinder 2: New Methods  
326 for Selecting Partitioned Models of Evolution for Molecular and Morphological Phylogenetic  
327 Analyses. *Mol Biol Evol* **34**: msw260.
- 328 Larson G, Cucchi T, Fujita M, Matisoo-smith E, Robins J, Anderson A, *et al.* (2007). Phylogeny  
329 and ancient DNA of *Sus* provides insights into neolithic expansion in Island Southeast Asia  
330 and Oceania. *Proc Natl Acad Sci U S A* **104**: 4834–4839.
- 331 Larson G, Fuller DQ (2014). The evolution of animal domestication. *Annu Rev Ecol Evol Syst* **45**:  
332 115–136.
- 333 Li H, Durbin R (2010). Fast and accurate long-read alignment with Burrows-Wheeler transform.  
334 *Bioinformatics* **26**: 589–95.
- 335 Li H, Handsaker B, Wysoker A, Fennell T, Ruan J, Homer N, *et al.* (2009). The Sequence  
336 Alignment/Map format and SAMtools. *Bioinformatics* **25**: 2078–2079.
- 337 Lindgreen S (2012). AdapterRemoval: easy cleaning of next-generation sequencing reads. *BMC Res*  
338 *Notes* **5**: 337.
- 339 Maricic T, Whitten M, Pääbo S (2010). Multiplexed DNA sequence capture of mitochondrial  
340 genomes using PCR products. *PLoS One* **5**: 9–13.
- 341 Mattucci F, Oliveira R, Bizzarri L, Vercillo F, Anile S, Ragni B, *et al.* (2013). Genetic structure of  
342 wildcat (*Felis silvestris*) populations in Italy. *Ecol Evol* **3**: 2443–2458.
- 343 Meyer M, Kircher M (2010). Illumina sequencing library preparation for highly multiplexed target  
344 capture and sequencing. *Cold Spring Harb Protoc* **5**: t5448.
- 345 Milne I, Stephen G, Bayer M, Cock PJA, Pritchard L, Cardle L, *et al.* (2013). Using Tablet for



- 346 visual exploration of second-generation sequencing data. *Brief Bioinform* **14**: 193–202.
- 347 Oliveira R, Godinho R, Randi E, Ferrand N, Alves PC (2008). Molecular analysis of hybridisation  
348 between wild and domestic cats (*Felis silvestris*) in Portugal: Implications for conservation.  
349 *Conserv Genet* **9**: 1–11.
- 350 Ottoni C, Girdland Flink L, Evin A, Georg C, De Cupere B, Van Neer W, *et al.* (2013). Pig  
351 domestication and human-mediated dispersal in western eurasia revealed through ancient DNA  
352 and geometric morphometrics. *Mol Biol Evol* **30**: 824–832.
- 353 Ottoni C, Van Neer W, De Cupere B, Daligault J, Guimaraes S, Peters J, *et al.* (2017). The  
354 palaeogenetics of cat dispersal in the ancient world. *Nat Ecol Evol* **1**: 139.
- 355 Rambaut A, Drummond AJ (2007). Tracer v. 1.5.
- 356 Randi E, Pierpaoli M, Beaumont M, Ragni B, Sforzi A (2001). Genetic identification of wild and  
357 domestic cats ( *Felis silvestris* ) and their hybrids using Bayesian clustering methods. *Mol Biol*  
358 *Evol* **18**: 1679–1693.
- 359 Reimer PJ, Bard E, Bayliss A, Beck JW, Blackwell PG, Bronk C, *et al.* (2013). Intcal13 and  
360 marine13 radiocarbon age calibration curves 0 – 50,000 years cal bp. *Radiocarbon* **55**: 1869–  
361 1887.
- 362 Rohland N, Harney E, Mallick S, Nordenfelt S, Reich D (2014). Partial uracil-DNA-glycosylase  
363 treatment for screening of ancient DNA. *Philos Trans R Soc B Biol Sci* **370**: 20130624–  
364 20130624.
- 365 Ronquist F, Teslenko M, van der Mark P, Ayres DL, Darling A, Höhna S, *et al.* (2012). MrBayes  
366 3.2: efficient Bayesian phylogenetic inference and model choice across a large model space.  
367 *Syst Biol* **61**: 539–42.
- 368 Starkel L, Michczyńska DJ, Krąpiec M, Margielewski W, Nalepka D, Pazdur A (2013). Progress in  
369 the Holocene chrono-climatostratigraphy of Polish territory. *Geochronometria* **40**: 1–21.
- 370 Starkel L, Soja R, Michczyńska DJ (2006). Past hydrological events reflected in Holocene history

371 of Polish rivers. *Catena* **66**: 24–33.

372 Timpson A, Colledge S, Crema E, Edinborough K, Kerig T, Manning K, *et al.* (2014).

373 Reconstructing regional population fluctuations in the European Neolithic using radiocarbon

374 dates: A new case-study using an improved method. *J Archaeol Sci* **52**: 549–557.

375 Toews DPL, Brelsford A (2012). The biogeography of mitochondrial and nuclear discordance in

376 animals. *Mol Ecol* **21**: 3907–3930.

377 Vigne J-D, Guilaine J, Debue K, Haye L, Gerard P (2004). Early taming of the cat in Cyprus.

378 *Science (80- )* **304**: 259.

379 Yamaguchi N, Kitchener AC, Driscoll CA, Nussberger B (2015). *Felis silvestris*. The IUCN Red

380 List of Threatened Species. *Felis silvestris IUCN Red List Threat Species*.

381

382

383 **Supporting Information:**

384 **Supplementary Figure 1** Damage patterns and reads length distributions of all *Felis* samples as

385 generated by mapDamage 2 software.

386 **Supplementary Table S1** Samples analysed in the study.

387 **Supplementary Table S2** Data blocks used for PartitionFinder analysis.

388 **Supplementary Table S3** Partitioning scheme and substitution models used in Bayesian analysis.

389 **Supplementary Table S4** Details of sequencing and consensus calling results.

390 **Supplementary Table S5** Details of radiocarbon dates used in this study.

391
